# Supplementary material for: High electron mobility and transverse negative magnetoresistance in van der Waals material Nb2GeTe4
Source: Royal Society of Chemistry journal article supplement (doi:10.1039/d1qm01075a), 2021-01-01
Supplement: d1qm01075a1.pdf [file d1qm01075a1.pdf]

# High electron mobility and transverse negative magnetoresistance in van der Waals material Nb<sub>2</sub>GeTe<sub>4</sub>

Xue Han,<sup>a</sup> Zhongnan Guo,<sup>\*a</sup> Long Chen,<sup>b,c</sup> Cheng Cao,<sup>b,c</sup> Gang Wang,<sup>b,d,e</sup> and Wenxia Yuan<sup>\*a</sup>

<sup>a</sup> *Department of Chemistry, School of Chemistry and Biological Engineering, University of Science and Technology Beijing, Beijing 100083, China*

<sup>b</sup> *Beijing National Laboratory for Condensed Matter Physics, Institute of Physics, Chinese Academy of Sciences, Beijing, 100190, China*

<sup>c</sup> *University of Chinese Academy of Sciences, Beijing 100049, China*

<sup>d</sup> *School of Physical Sciences, University of Chinese Academy of Sciences, Beijing 100049, China*

<sup>e</sup> *Songshan Lake Materials Laboratory, Dongguan, Guangdong 523808, China*

\*Authors to whom correspondence should be addressed: [guozhongn@ustb.edu.cn](mailto:guozhongn@ustb.edu.cn) and [wxyuanwz@163.com](mailto:wxyuanwz@163.com)

**Table S1.** Crystal data and structure refinement for Nb<sub>2</sub>GeTe<sub>4</sub> at 293 K.

|                                                                                                                                                                                                                                      |                                                                                                                                                             |
|--------------------------------------------------------------------------------------------------------------------------------------------------------------------------------------------------------------------------------------|-------------------------------------------------------------------------------------------------------------------------------------------------------------|
| Empirical formula                                                                                                                                                                                                                    | Nb <sub>2</sub> GeTe <sub>4</sub>                                                                                                                           |
| Wavelength                                                                                                                                                                                                                           | 0.71073 Å                                                                                                                                                   |
| Crystal system                                                                                                                                                                                                                       | monoclinic                                                                                                                                                  |
| Space group                                                                                                                                                                                                                          | <i>P2<sub>1</sub>/n</i>                                                                                                                                     |
| Unit cell dimensions                                                                                                                                                                                                                 | $a = 6.4601(8) \text{ \AA}, \alpha = 90^\circ$<br>$b = 7.9259(10) \text{ \AA}, \beta = 97.843(4)^\circ$<br>$c = 14.2127(17) \text{ \AA}, \gamma = 90^\circ$ |
| Volume                                                                                                                                                                                                                               | 720.91(15) Å <sup>3</sup>                                                                                                                                   |
| Z                                                                                                                                                                                                                                    | 1                                                                                                                                                           |
| $\theta$ range for data collection                                                                                                                                                                                                   | 2.893 to 28.299°                                                                                                                                            |
| Index ranges                                                                                                                                                                                                                         | $-6 \leq h \leq 8, -10 \leq k \leq 10, -18 \leq l \leq 18$                                                                                                  |
| Reflections collected                                                                                                                                                                                                                | 7635                                                                                                                                                        |
| Independent reflections                                                                                                                                                                                                              | 1742 [ $R_{\text{int}} = 0.0513$ ]                                                                                                                          |
| Completeness to $\theta = 25.242^\circ$                                                                                                                                                                                              | 96.8%                                                                                                                                                       |
| Refinement method                                                                                                                                                                                                                    | Full-matrix least-squares on $F^2$                                                                                                                          |
| Data / restraints / parameters                                                                                                                                                                                                       | 1742 / 0 / 64                                                                                                                                               |
| Goodness-of-fit                                                                                                                                                                                                                      | 1.180                                                                                                                                                       |
| Final R indices [ $I > 2\sigma(I)$ ]                                                                                                                                                                                                 | $R_{\text{obs}} = 0.1242, wR_{\text{obs}} = 0.3311$                                                                                                         |
| R indices [all data]                                                                                                                                                                                                                 | $R_{\text{all}} = 0.1251, wR_{\text{all}} = 0.3318$                                                                                                         |
| <hr/> $R = \frac{\sum   F_o  -  F_c  }{\sum  F_o }, \quad wR = \frac{\{\sum [w( F_o ^2 -  F_c ^2)^2]\}^{1/2}}{\sum [w( F_o ^4)]^{1/2}}$ and $w = 1/[\sigma^2(F_o^2) + (0.1846P)^2 + 170.5381P]$ where $P = (F_o^2 + 2F_c^2)/3$ <hr/> |                                                                                                                                                             |

**Table S2.** Atomic coordinates ( $\times 10^4$ ) and equivalent isotropic displacement parameters ( $\text{\AA}^2 \times 10^3$ ) for  $\text{Nb}_2\text{GeTe}_4$  at 293 K with estimated standard deviations in parentheses.

| Label | x        | y        | z       | Occupancy | $U_{\text{eq}}^*$ |
|-------|----------|----------|---------|-----------|-------------------|
| Te(1) | 2453(3)  | 7395(2)  | 1162(2) | 1         | 4(1)              |
| Te(2) | -1751(3) | 10123(2) | 3838(2) | 1         | 3(1)              |
| Te(3) | -2556(2) | 10126(2) | 1153(2) | 1         | 3(1)              |
| Te(4) | 1725(2)  | 12426(2) | 1154(2) | 1         | 3(1)              |
| Nb(1) | 1060(3)  | 9656(3)  | 2494(2) | 1         | 2(1)              |
| Nb(2) | 6066(3)  | 7858(3)  | 2499(2) | 1         | 1(1)              |
| Ge(1) | 12(4)    | 6263(3)  | 2510(2) | 1         | 3(1)              |

\* $U_{\text{eq}}$  is defined as one third of the trace of the orthogonalized  $U_{ij}$  tensor.

**Table S3.** Anisotropic displacement parameters ( $\text{\AA}^2 \times 10^3$ ) for  $\text{Nb}_2\text{GeTe}_4$  at 293 K with estimated standard deviations in parentheses.

| Label | $U_{11}$ | $U_{22}$ | $U_{33}$ | $U_{12}$ | $U_{13}$ | $U_{23}$ |
|-------|----------|----------|----------|----------|----------|----------|
| Te(1) | 4(1)     | 2(1)     | 6(1)     | -1(1)    | 2(1)     | 0(1)     |
| Te(2) | 3(1)     | 2(1)     | 5(1)     | -3(1)    | 1(1)     | 0(1)     |
| Te(3) | 2(1)     | 2(1)     | 6(1)     | -2(1)    | 2(1)     | 1(1)     |
| Te(4) | 2(1)     | 2(1)     | 6(1)     | 1(1)     | 3(1)     | 0(1)     |
| Nb(1) | 0(1)     | -1(1)    | 8(2)     | 0(1)     | 3(1)     | -1(1)    |
| Nb(2) | 0(1)     | -1(1)    | 5(2)     | 0(1)     | 2(1)     | 0(1)     |
| Ge(1) | -1(2)    | 0(2)     | 10(2)    | 0(1)     | 2(1)     | 0(1)     |

The anisotropic displacement factor exponent takes the form:  $-2\pi^2[h^2a^{*2}U_{11} + \dots + 2hka^*b^*U_{12}]$ .

**Table S4.** The details of Hall resistivity data plotted in Figure 3.

| T(K) | $R_H$ ( $\text{cm}^3\text{C}^{-1}$ ) | $\rho_{xx}$ ( $\Omega\cdot\text{cm}$ ) | $\mu$ ( $\text{cm}^2\text{V}^{-1}\text{s}^{-1}$ ) | $n$ ( $\times 10^{18}\text{cm}^{-3}$ ) |
|------|--------------------------------------|----------------------------------------|---------------------------------------------------|----------------------------------------|
| 5    | -2.37                                | 2.7092                                 | 0.88                                              | 2.64                                   |
| 10   | -1.96                                | 0.8318                                 | 2.36                                              | 3.19                                   |
| 50   | -1.69                                | 0.0278                                 | 60.98                                             | 3.69                                   |
| 100  | -1.51                                | 0.0049                                 | 307.73                                            | 4.13                                   |
| 150  | -1.31                                | 0.0028                                 | 476.23                                            | 4.77                                   |
| 200  | -1.15                                | 0.0022                                 | 518.28                                            | 5.45                                   |
| 300  | -0.88                                | 0.0021                                 | 424.37                                            | 7.11                                   |

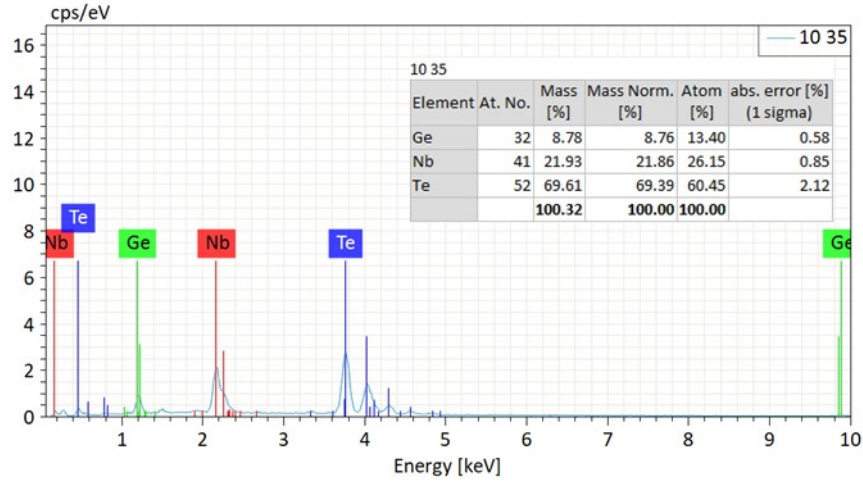

**Figure S1.** EDS measurement indicates the atomic ratios of Nb, Ge and Te elements.

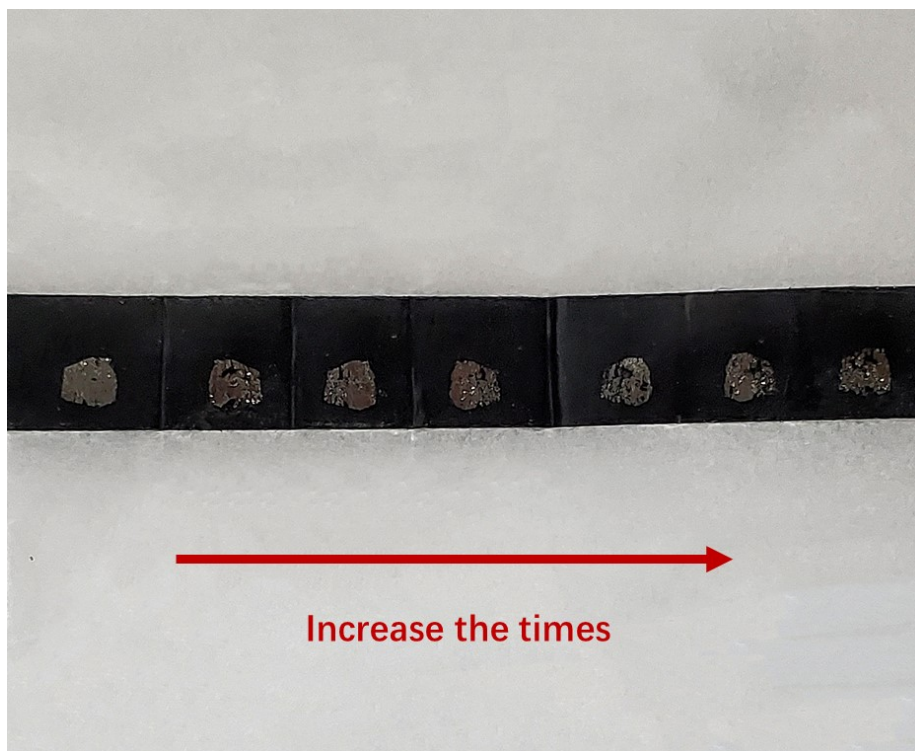

**Figure S2.** The photo of Nb<sub>2</sub>GeTe<sub>4</sub> thin flakes, which can be easily obtained by mechanical exfoliation using Scotch-tape method.

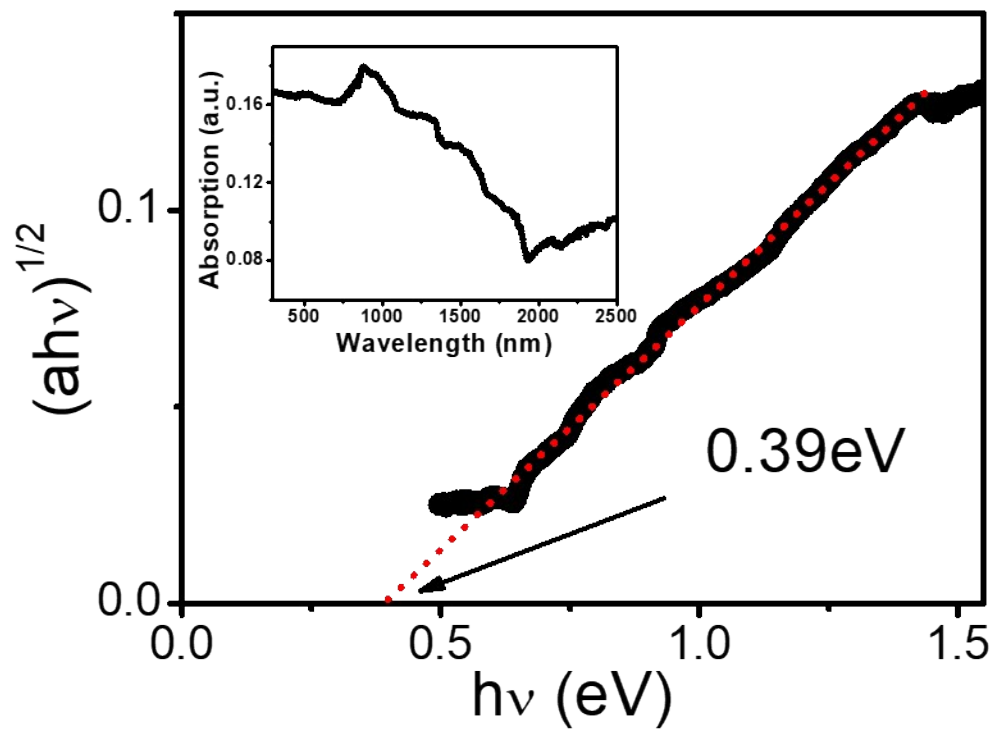

**Figure S3.** UV-vis-NIR absorption spectra (inset) and the plots of  $(ah\nu)^{1/2}$  versus photo energy of  $\text{Nb}_2\text{GeTe}_4$
